# Supplementary material for: Heterogeneous Ni3P/Ni nanoparticles with optimized Ni active sites anchored in N-doped mesoporous nanofibers for boosting pH-universal hydrogen evolution
Source: Royal Society of Chemistry journal article supplement (doi:10.1039/d2nr04053k), 2022-01-01
Supplement: d2nr04053k1.pdf [file d2nr04053k1.pdf]

**Supporting Information (SI):**

**Heterogeneous Ni<sub>3</sub>P/Ni nanoparticles with optimized Ni active sites anchored in N-doped mesoporous nanofibers for boosting pH-universal hydrogen evolution**

Changle Fu<sup>a</sup>, Liangliang Feng<sup>a,\*</sup>, Hongyan Yin<sup>a</sup>, Yuhang Li<sup>a</sup>, Yajie Xie<sup>a</sup>, Yongqiang Feng<sup>a</sup>, Yajuan Zhao<sup>a</sup>, Liyun Cao<sup>a</sup>, Jianfeng Huang<sup>a</sup>, Yipu Liu<sup>b,\*</sup>

<sup>a</sup> *School of Materials Science & Engineering, Key Laboratory of Auxiliary Chemistry and Technology for Chemical Industry, Ministry of Education, Shaanxi University of Science & Technology, Xi'an Shaanxi, 710021, P.R. China.*

<sup>b</sup> *State Key Laboratory of Marine Resource Utilization in South China Sea, School of Materials Science and Engineering, Hainan University, Haikou 570228 P. R. China*

\* Corresponding authors.

*E-mail addresses:* fengll@sust.edu.cn (L. Feng), lyp1992lyp@163.com (Y. Liu).

Number of pages: 42

Number of figures: 30

Number of tables: 8

**Containing 42 pages, 30 Figures and 8 Tables**

**Additional images and data:**

**Fig. S1.** (a) XRD patterns and (b) zoomed-in local patterns of Ni<sub>3</sub>P/Ni@N-CNFs-600, Ni<sub>3</sub>P/Ni@N-CNFs-700, Ni<sub>3</sub>P/Ni@N-CNFs-800 and Ni<sub>3</sub>P/Ni@N-CNFs-900.

**Fig. S2.** SEM images at different magnifications for (a, b) Ni<sub>3</sub>P/Ni@N-CNFs-600; (c, d) Ni<sub>3</sub>P/Ni@N-CNFs-700; (e, f) Ni<sub>3</sub>P/Ni@N-CNFs-800; and (g, h) Ni<sub>3</sub>P/Ni@N-CNFs-900.

**Fig. S3.** (a) SEM image and (b) TEM image of Ni@N-CNFs.

**Fig. S4.** (a, b) SEM image at different magnifications for Ni<sub>3</sub>P.

**Fig. S5.** The XPS survey spectrum of the Ni<sub>3</sub>P/Ni@N-CNFs.

**Fig. S6.** The N 1s high-resolution XPS spectra of Ni<sub>3</sub>P/Ni@N-CNFs-600, Ni<sub>3</sub>P/Ni@N-CNFs-800 and Ni<sub>3</sub>P/Ni@N-CNFs-900.

**Fig. S7.** The LSV performance curves of Ni<sub>3</sub>P/Ni@N-CNFs-600, Ni<sub>3</sub>P/Ni@N-CNFs-700, Ni<sub>3</sub>P/Ni@N-CNFs-800 and Ni<sub>3</sub>P/Ni@N-CNFs-900 under the condition of 1 M KOH; and (b) the corresponding curve for the relationship between calcination temperature and catalytic performance.

**Fig. S8.** The XPS survey spectrum of the Ni@N-CNFs and Ni<sub>3</sub>P.

**Fig. S9.** Cyclic voltammetry curves of the samples with different scanning rates (20, 40, 60, 80, 100, 120, 140 mV s<sup>-1</sup>) for HER in 0.5 M H<sub>2</sub>SO<sub>4</sub> electrolyte. (a) Ni<sub>3</sub>P/Ni@N-CNFs; (b) Ni@N-CNFs; and (c) Ni<sub>3</sub>P.

**Fig. S10.** LSVs normalized by ECSA of HER under acidic condition.

**Fig. S11.** The fitted equivalent circuit model of as-synthesized electrocatalysts.

**Fig. S12.** The Bode plot of Ni<sub>3</sub>P/Ni@N-CNFs, Ni@N-CNFs and Ni<sub>3</sub>P drawn from EIS measurements.

**Fig. S13.** (a) The testing device of Faraday efficiency and (b) Hydrogen production efficiency of Ni<sub>3</sub>P/Ni@N-CNFs under acidic condition.

**Fig. S14.** (a) TEM image and (b) HRTEM image of the Ni<sub>3</sub>P/Ni@N-CNFs after stability test of *i-t* curve for 60 h at pH 0.

**Fig. S15.** XPS spectra of the Ni<sub>3</sub>P/Ni@N-CNFs after HER electrochemical test in 0.5 M H<sub>2</sub>SO<sub>4</sub>: (a) C 1s; (b) N 1s; (c) Ni 2p; (d) P 2p.

**Fig. S16.** The corresponding Tafel slopes the Ni<sub>3</sub>P/Ni@N-CNFs and control samples in 1 M KOH.

**Fig. S17.** Cyclic voltammetry curves of the samples with different scanning rates (10, 20, 40, 60, 80, 100, 120, 140 mV s<sup>-1</sup>) for HER in 1 M KOH electrolyte. (a) Ni<sub>3</sub>P/Ni@N-CNFs; (b) Ni@N-CNFs; and (c) Ni<sub>3</sub>P.

**Fig. S18.** LSVs normalized by ECSA of HER under alkaline condition.

**Fig. S19.** (a) The double-layer capacitance ( $C_{dl}$ ) for the evaluation of ECSA and (b) Bode plot of Ni<sub>3</sub>P/Ni@N-CNFs, Ni@N-CNFs and Ni<sub>3</sub>P in alkaline media.

**Fig. S20.** (a) TEM image and (b) HRTEM image of the Ni<sub>3</sub>P/Ni@N-CNFs after stability test of *i-t* curve for 60 h at pH 14.

**Fig. S21.** XPS spectra of the Ni<sub>3</sub>P/Ni@N-CNFs after HER electrochemical test in 1 M KOH: (a) C 1s; (b) N 1s; (c) Ni 2p; (d) P 2p.

**Fig. S22.** (a) Multi-step chronoamperometric curve at diverse overpotentials and (b) hydrogen production efficiency of Ni<sub>3</sub>P/Ni@N-CNFs under alkaline condition.

**Fig. S23.** The corresponding Tafel slopes the Ni<sub>3</sub>P/Ni@N-CNFs and control samples in 1 M PBS.

**Fig. S24.** Cyclic voltammetry curves of the samples with different scanning rates (10, 20, 40, 60, 80, 100, 120, 140 mV s<sup>-1</sup>) for HER in 1 M PBS electrolyte. (a) Ni<sub>3</sub>P/Ni@N-CNFs; (b) Ni@N-CNFs; and (c) Ni<sub>3</sub>P.

**Fig. S25.** LSVs normalized by ECSA of HER under neutral condition.

**Fig. S26.** (a) The double-layer capacitance ( $C_{dl}$ ) for the evaluation of ECSA and (b) Bode plot of Ni<sub>3</sub>P/Ni@N-CNFs, Ni@N-CNFs and Ni<sub>3</sub>P in neutral media.

**Fig. S27.** Multi-step chronoamperometric curve at diverse overpotentials of Ni<sub>3</sub>P/Ni@N-CNFs under neutral condition.

**Fig. S28.** (a) TEM image and (b) HRTEM image of the Ni<sub>3</sub>P/Ni@N-CNFs after stability test of *i-t* curve for 60 h at pH 7.

**Fig. S29.** XPS spectra of the Ni<sub>3</sub>P/Ni@N-CNFs after HER electrochemical test in 1 M PBS: (a) C 1s; (b) N 1s; (c) Ni 2p; (d) P 2p.

**Fig. S30.** Hydrogen production efficiency of Ni<sub>3</sub>P/Ni@N-CNFs under neutral condition.

**Table S1.** Surface elements contents of samples at different temperatures obtained by XPS.

**Table S2.** (a) The details for calculated fractions of each nitrogen species in the N 1s XPS

spectrum. (b) The details of the proportion of each N species in the whole sample were derived from the calculations.

**Table S3.** Fitted data from Nyquist plots of as-prepared samples in electrocatalytic HER test under 0.5 M H<sub>2</sub>SO<sub>4</sub>.

**Table S4.** Comparison of HER performance between the results from the present research with other recently-reported metal phosphides in 0.5 M H<sub>2</sub>SO<sub>4</sub>.

**Table S5.** Fitted data from Nyquist plots of as-prepared samples in electrocatalytic HER test under 1 M KOH.

**Table S6.** Fitted data from Nyquist plots of as-prepared samples in electrocatalytic HER test under 1 M PBS.

**Table S7.** Comparison of HER performance between the results from the present research with other recently-reported metal phosphides in 1 M KOH.

**Table S8.** Comparison of HER performance between the results from the present research with other recently-reported metal phosphides in 1 M PBS.

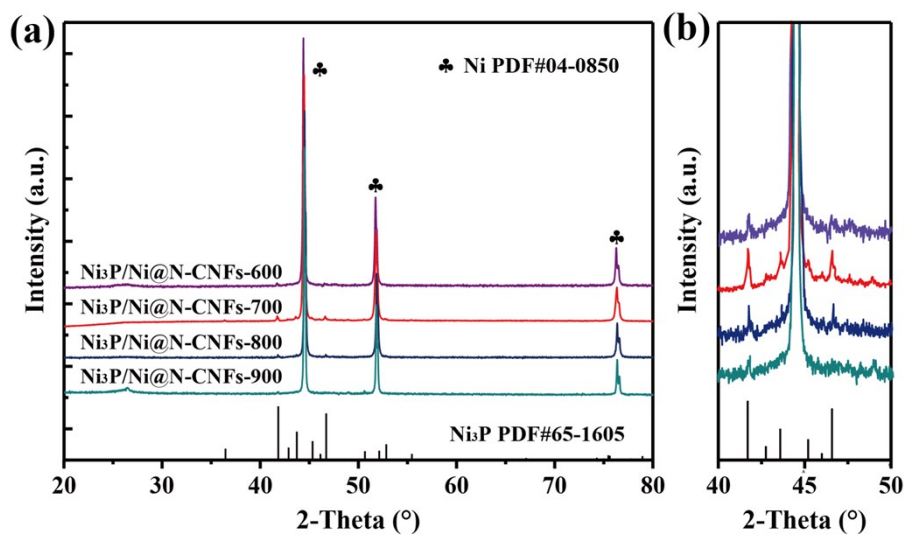

**Fig. S1.** (a) XRD patterns and (b) zoomed-in local patterns of Ni<sub>3</sub>P/Ni@N-CNFs-600, Ni<sub>3</sub>P/Ni@N-CNFs-700, Ni<sub>3</sub>P/Ni@N-CNFs-800 and Ni<sub>3</sub>P/Ni@N-CNFs-900.

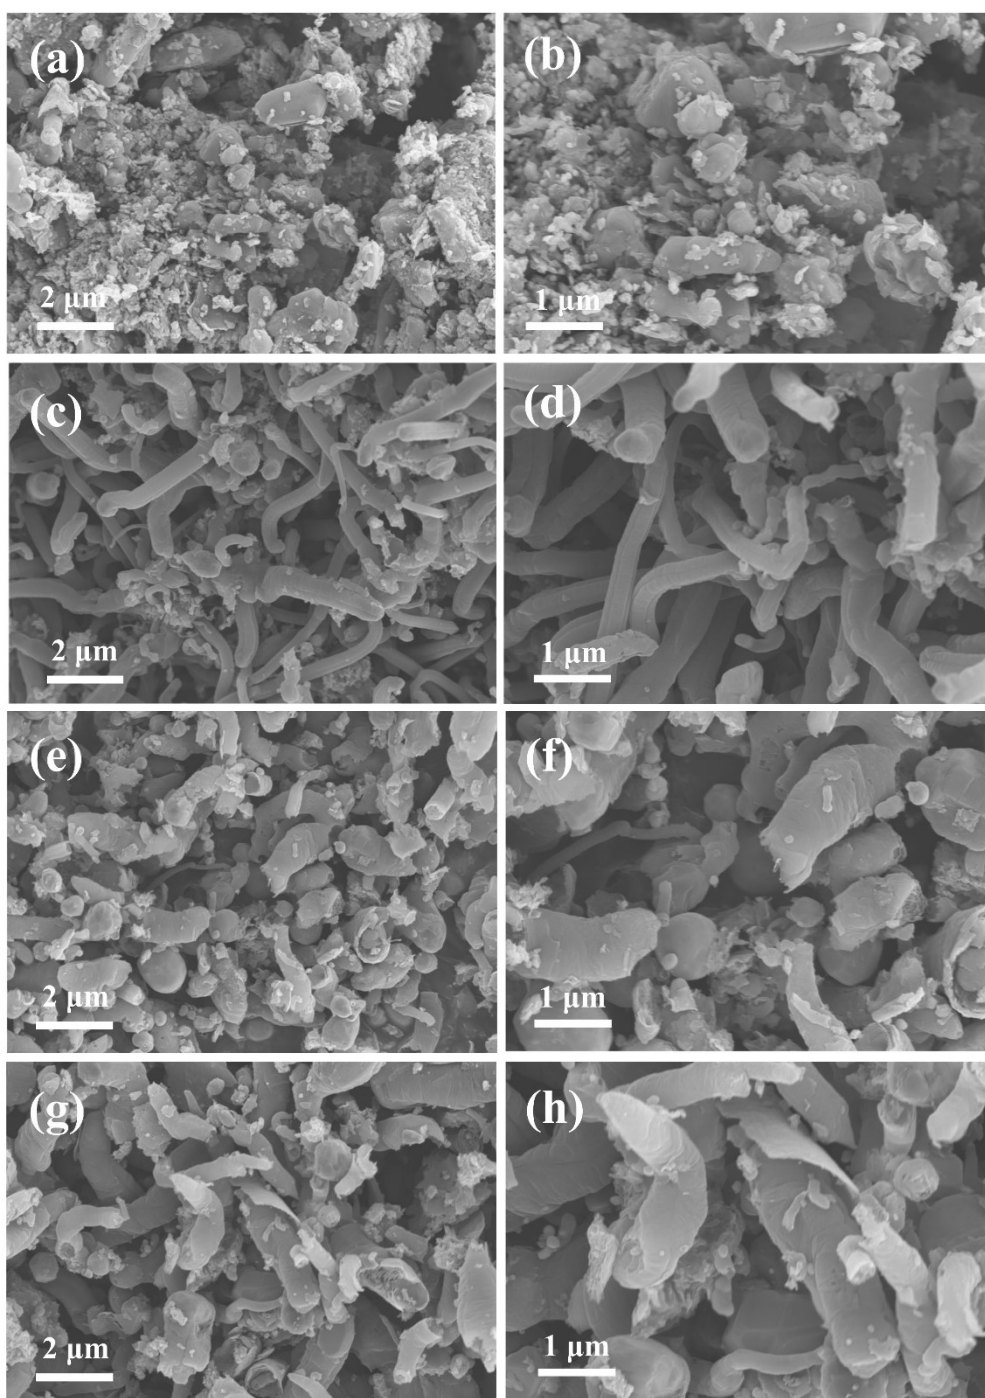

**Fig. S2.** SEM images at different magnifications for (a, b) Ni<sub>3</sub>P/Ni@N-CNFs-600; (c, d) Ni<sub>3</sub>P/Ni@N-CNFs-700; (e, f) Ni<sub>3</sub>P/Ni@N-CNFs-800; and (g, h) Ni<sub>3</sub>P/Ni@N-CNFs-900.

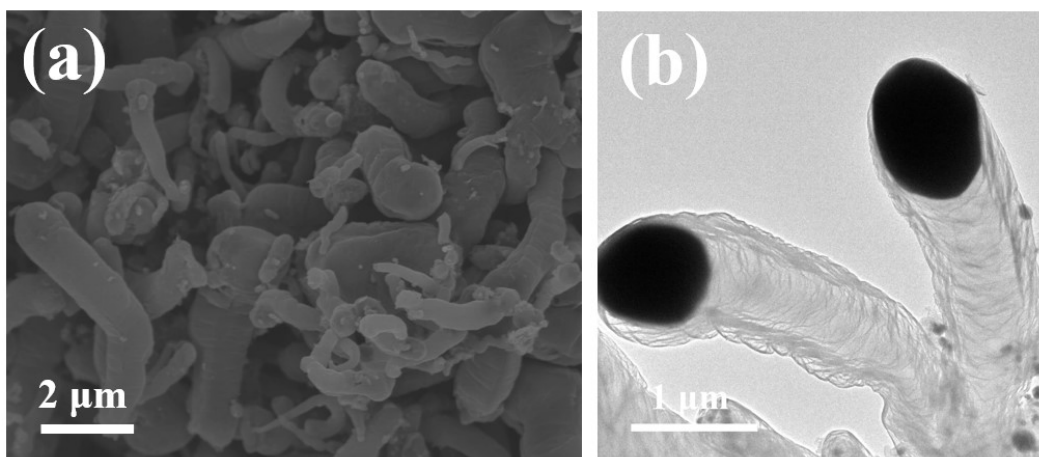

**Fig. S3.** (a) SEM image and (b) TEM image of Ni@N-CNFs.

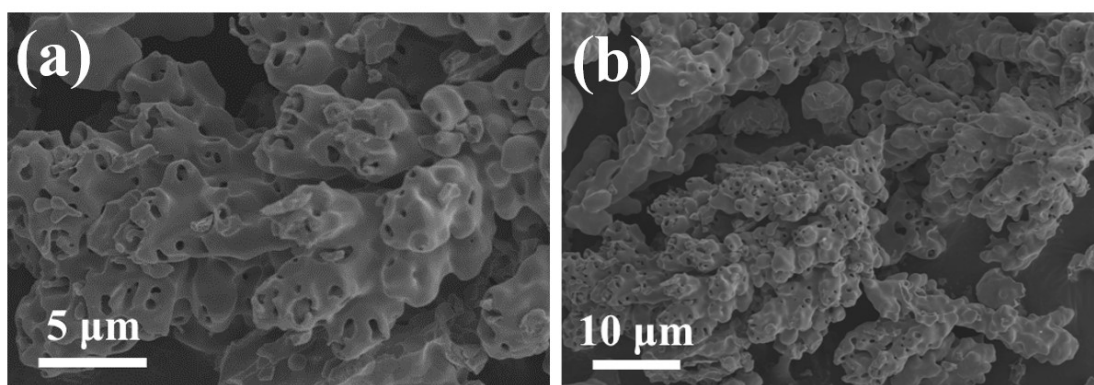

**Fig. S4.** (a, b) SEM image at different magnifications for Ni<sub>3</sub>P.



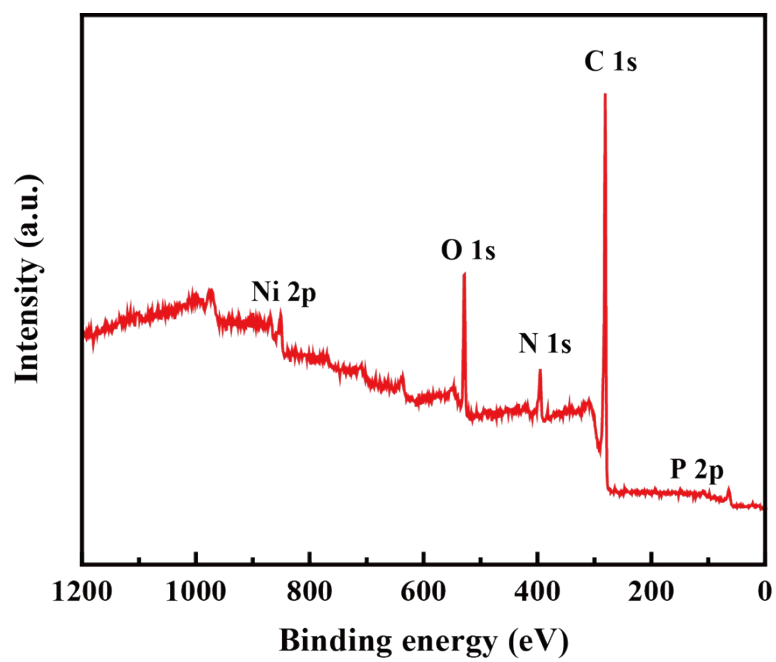

**Fig. S5.** The XPS survey spectrum of Ni<sub>3</sub>P/Ni@N-CNFs.

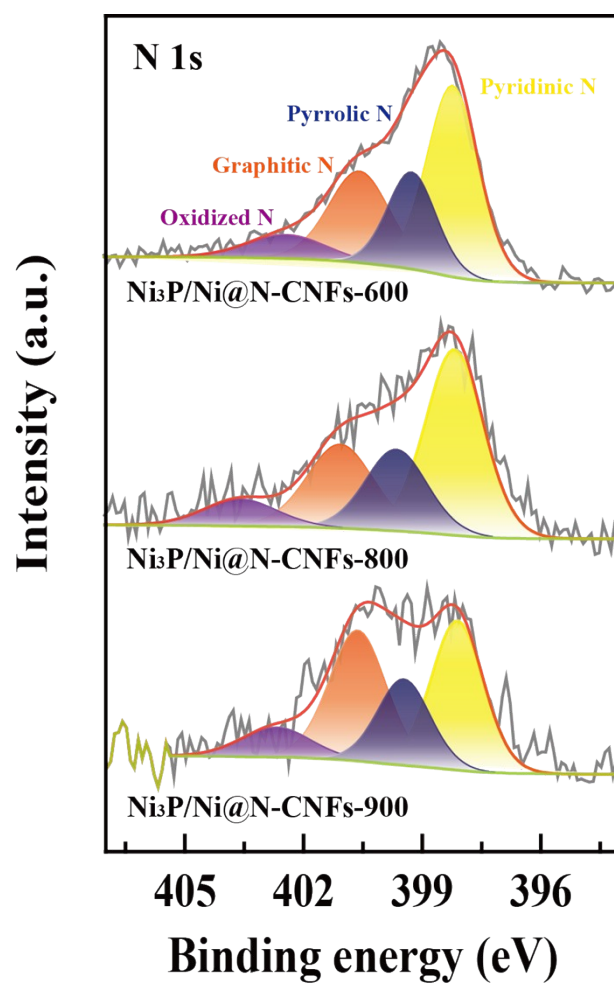

**Fig. S6.** The N 1s high-resolution XPS spectra of Ni<sub>3</sub>P/Ni@N-CNFs-600, Ni<sub>3</sub>P/Ni@N-CNFs-800 and Ni<sub>3</sub>P/Ni@N-CNFs-900.

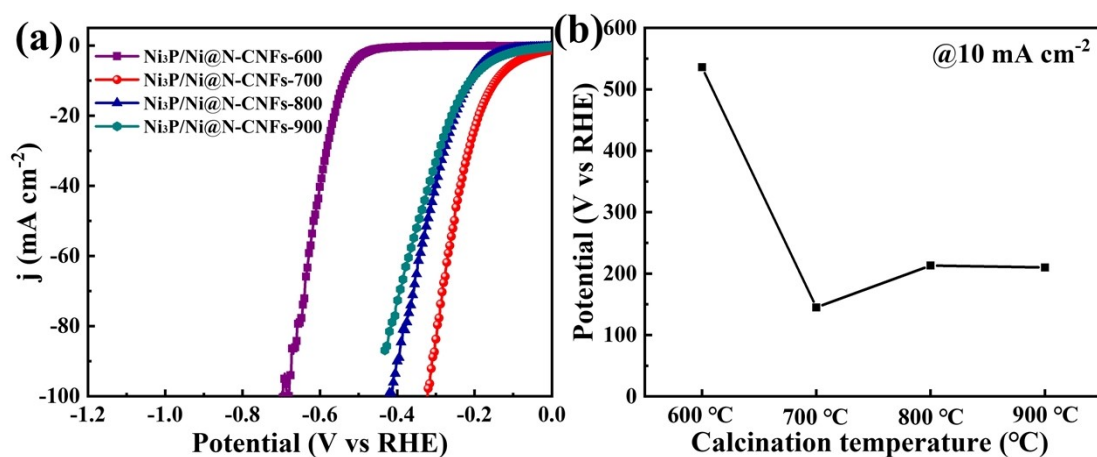

**Fig. S7.** (a) LSV curves of Ni<sub>3</sub>P/Ni@N-CNFs-600, Ni<sub>3</sub>P/Ni@N-CNFs-700, Ni<sub>3</sub>P/Ni@N-CNFs-800 and Ni<sub>3</sub>P/Ni@N-CNFs-900 in 1 M KOH; and (b) the corresponding curve for the relationship between calcination temperature and catalytic performance.

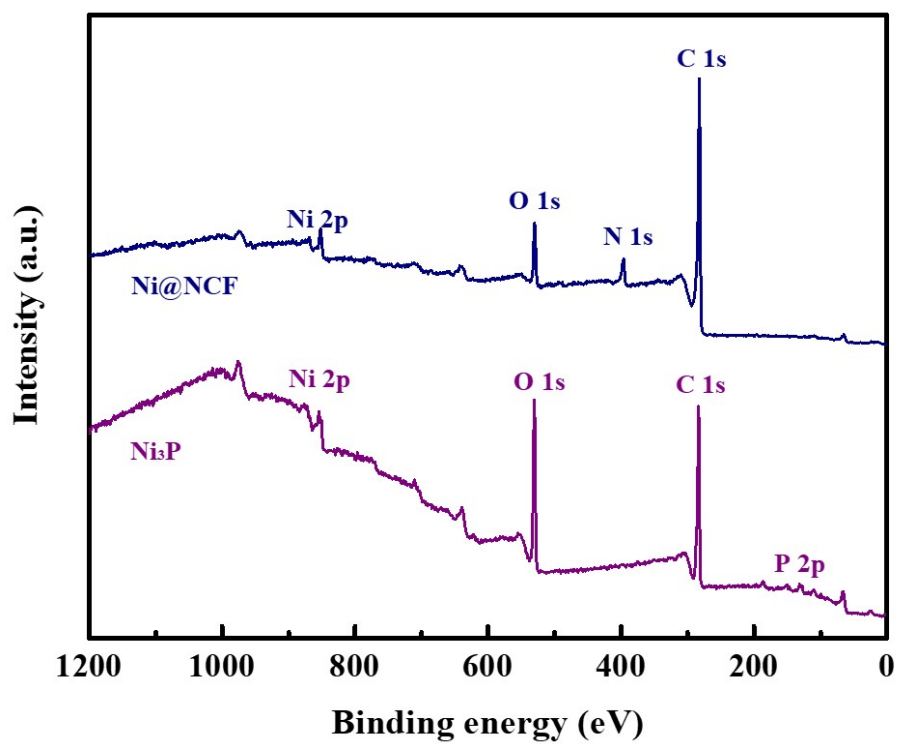

Fig. S8. The XPS survey spectra of the Ni@N-CNFs and Ni<sub>3</sub>P.

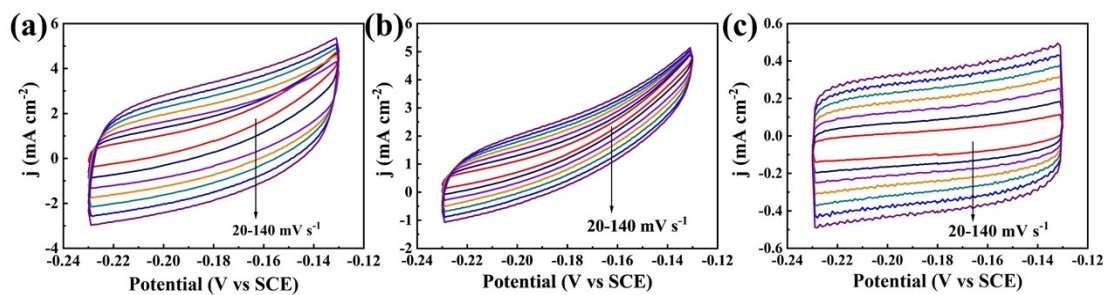

**Fig. S9.** Cyclic voltammetry curves of the samples with different scanning rates (20, 40, 60, 80, 100, 120, 140  $\text{mV s}^{-1}$ ) for HER in 0.5 M  $\text{H}_2\text{SO}_4$  electrolyte. (a)  $\text{Ni}_3\text{P/Ni@N-CNFs}$ ; (b)  $\text{Ni@N-CNFs}$ ; and (c)  $\text{Ni}_3\text{P}$ .

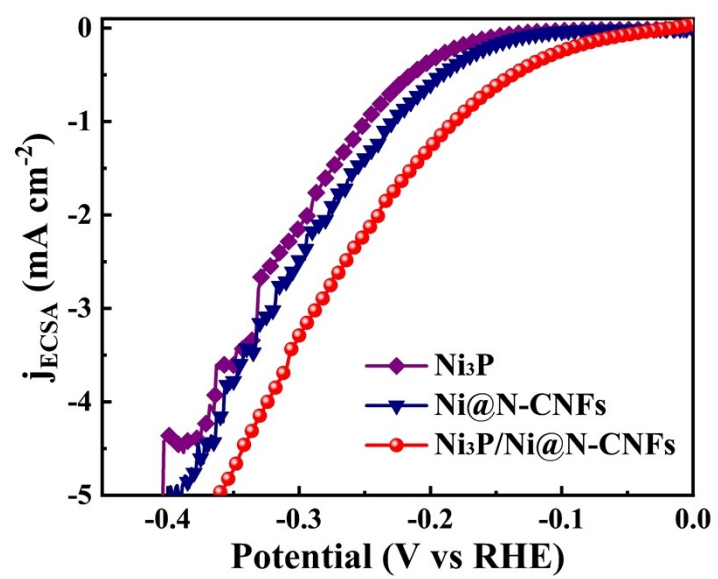

Fig. S10. LSVs normalized by ECSA of HER under acidic condition.

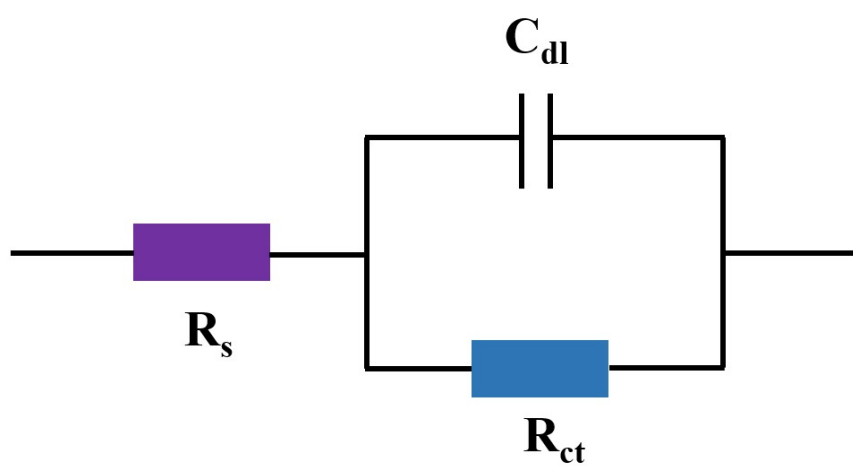

**Fig. S11.** The fitted equivalent circuit model of as-synthesized electrocatalysts.

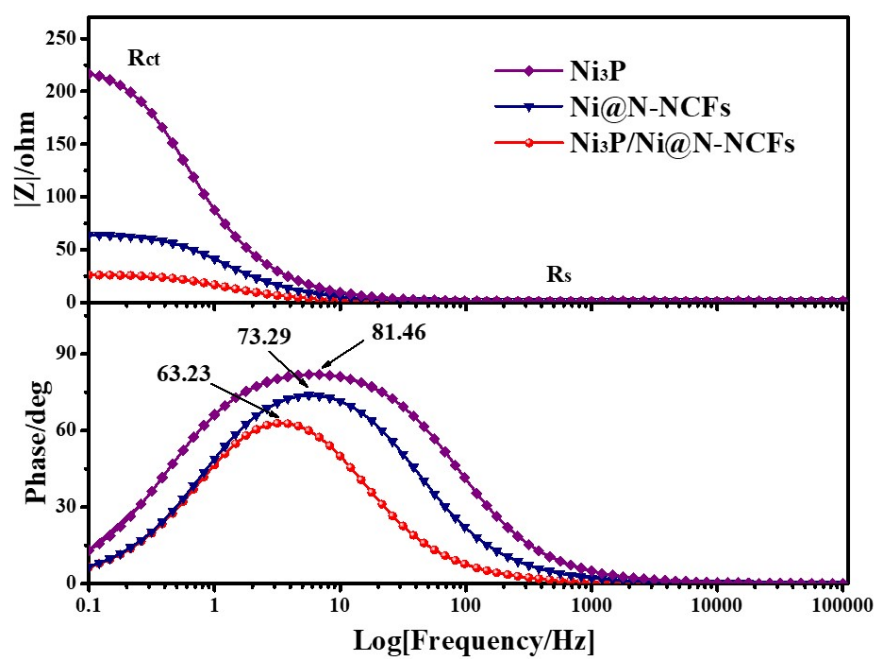

**Fig. S12.** The Bode plot of  $\text{Ni}_3\text{P/Ni@N-CNFs}$ ,  $\text{Ni@N-CNFs}$  and  $\text{Ni}_3\text{P}$  drawn from EIS measurements.



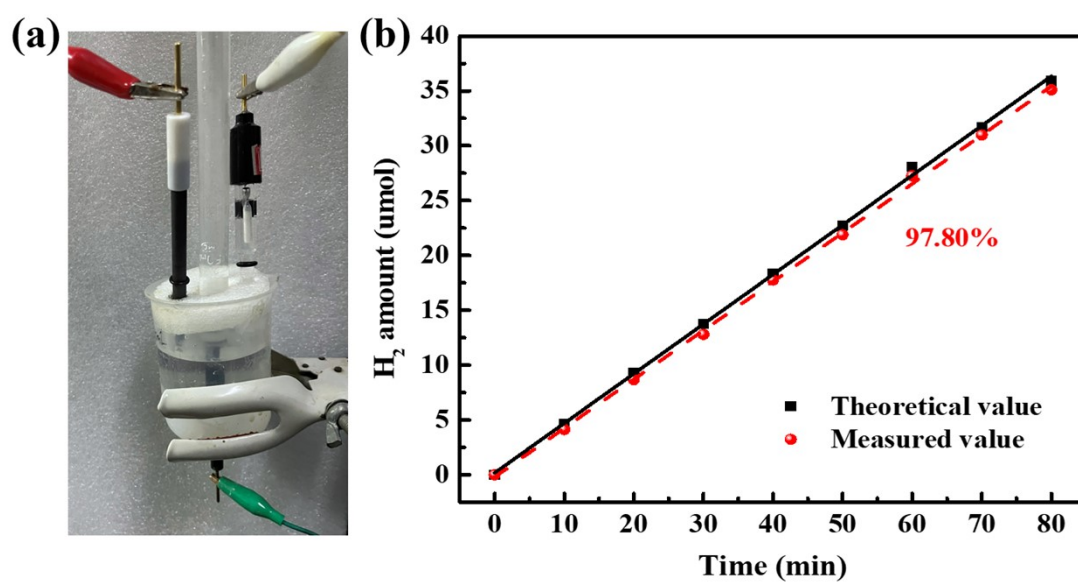

**Fig. S13.** (a) The testing device of Faraday efficiency and (b) hydrogen production efficiency of  $\text{Ni}_3\text{P}/\text{Ni}@N\text{-CNFs}$  under the acidic conditions.

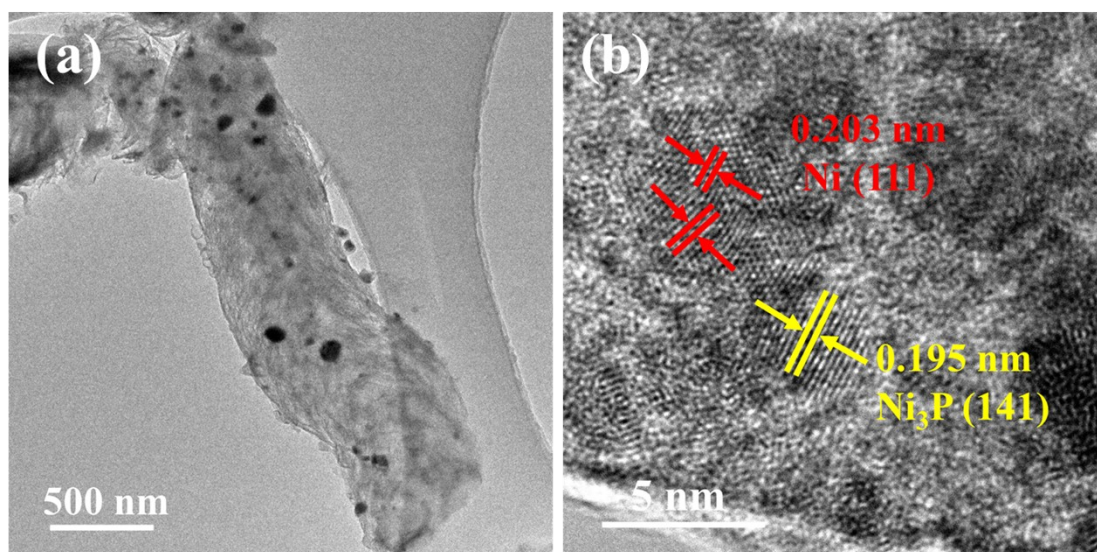

**Fig. S14.** (a) TEM image and (b) HRTEM image of the Ni<sub>3</sub>P/Ni@N-CNFs after stability test of *i-t* curve for 60 h at pH 0.

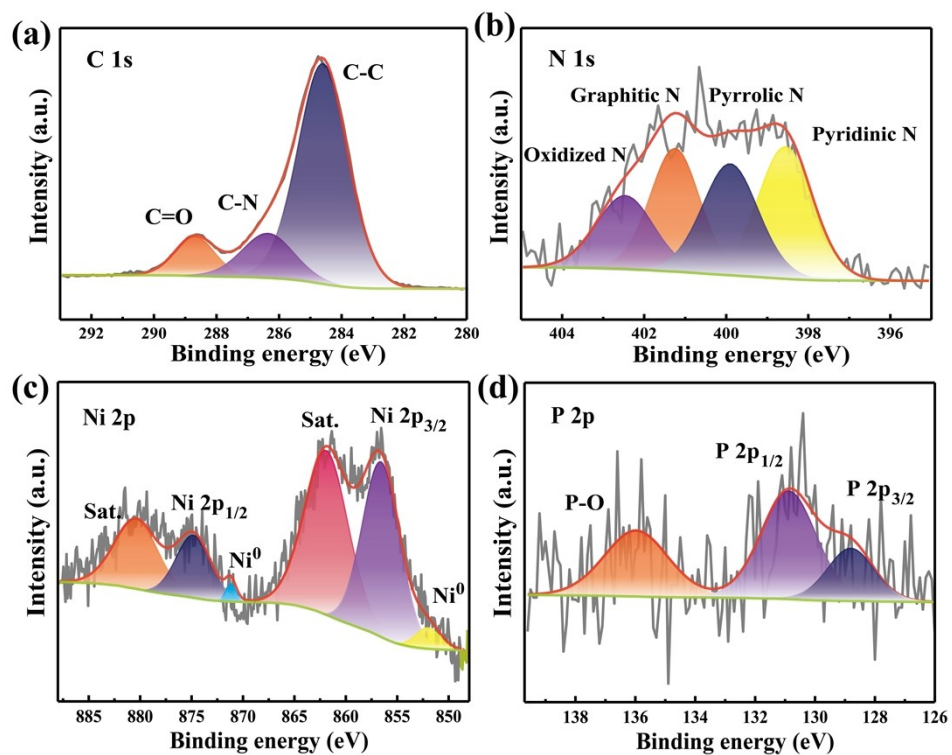

**Fig. S15.** XPS spectra of the Ni<sub>3</sub>P/Ni@N-CNFs after HER electrochemical test in 0.5 M H<sub>2</sub>SO<sub>4</sub>:

(a) C 1s; (b) N 1s; (c) Ni 2p; (d) P 2p.

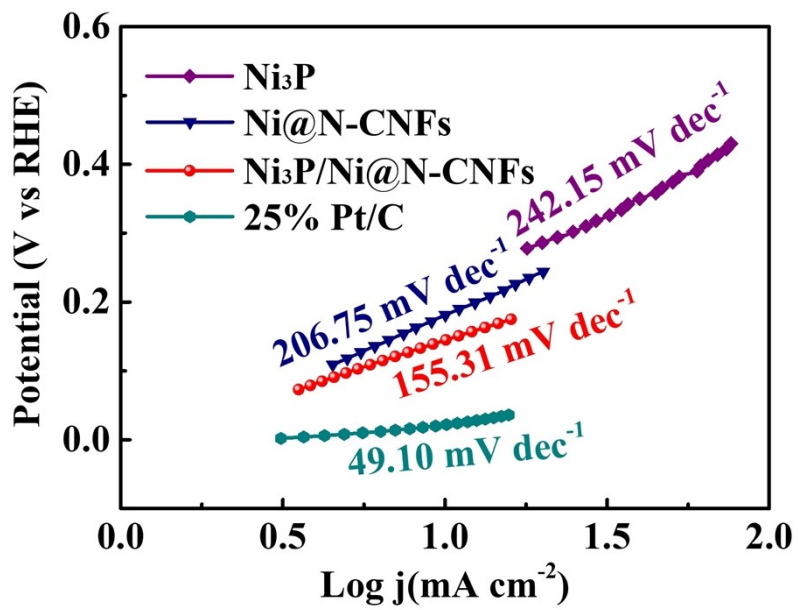

**Fig. S16.** The corresponding Tafel slopes the Ni<sub>3</sub>P/Ni@N-CNFs and control samples in 1 M KOH.

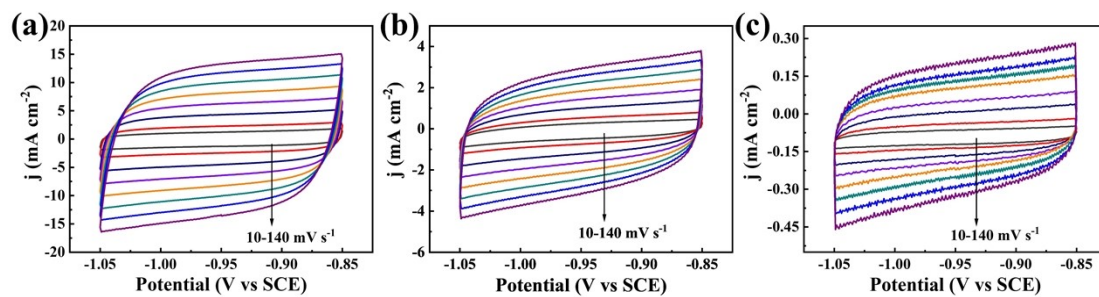

**Fig. S17.** Cyclic voltammetry curves of the samples with different scanning rates (10, 20, 40, 60, 80, 100, 120, 140  $\text{mV s}^{-1}$ ) for HER in 1 M KOH electrolyte. (a)  $\text{Ni}_3\text{P/Ni@N-CNFs}$ ; (b)  $\text{Ni@N-CNFs}$ ; and (c)  $\text{Ni}_3\text{P}$ .

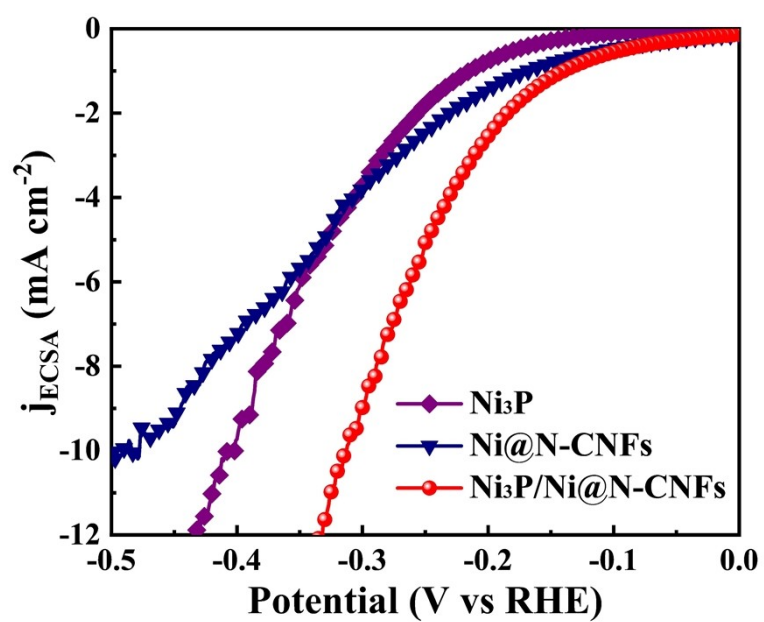

Fig. S18. LSVs normalized by ECSA of HER under alkaline condition.

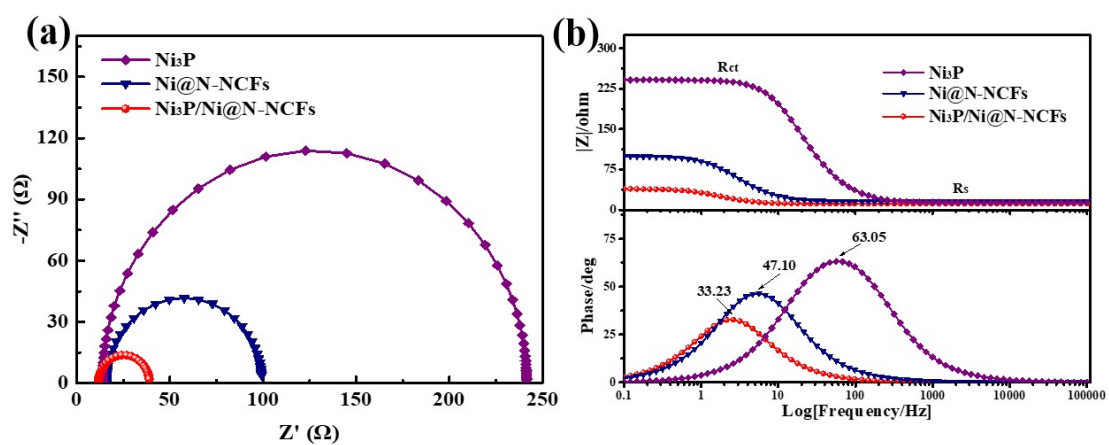

**Fig. S19.** (a) The double-layer capacitance ( $C_{dl}$ ) for the evaluation of ECSA and (b) Bode plot of  $\text{Ni}_3\text{P/Ni@N-CNFs}$ ,  $\text{Ni@N-CNFs}$  and  $\text{Ni}_3\text{P}$  in alkaline media.

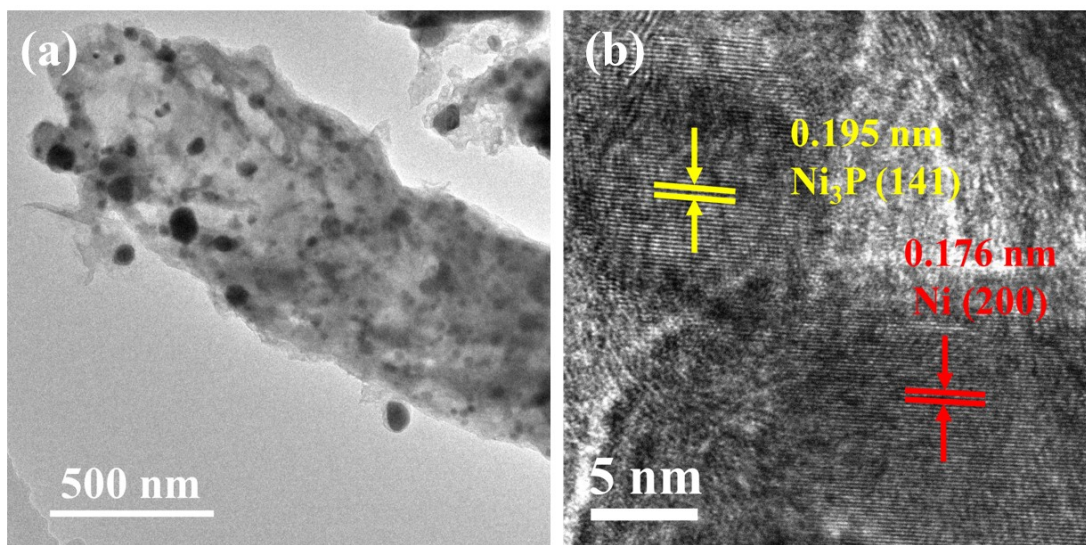

**Fig. S20.** (a) TEM image and (b) HRTEM image of the Ni<sub>3</sub>P/Ni@N-CNFs after stability test of *i-t* curve for 60 h at pH 14.



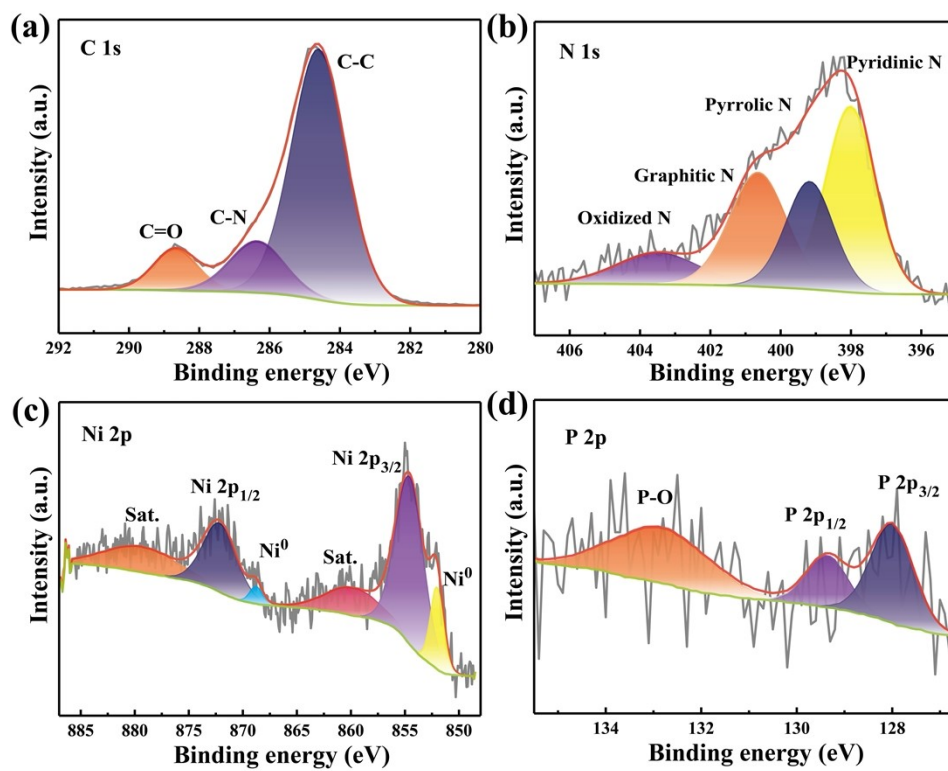

**Fig. S21.** XPS spectra of the  $\text{Ni}_3\text{P}/\text{Ni}@\text{N}$ -CNFs after HER electrochemical test in 1 M KOH: (a)

C 1s; (b) N 1s; (c) Ni 2p; (d) P 2p.

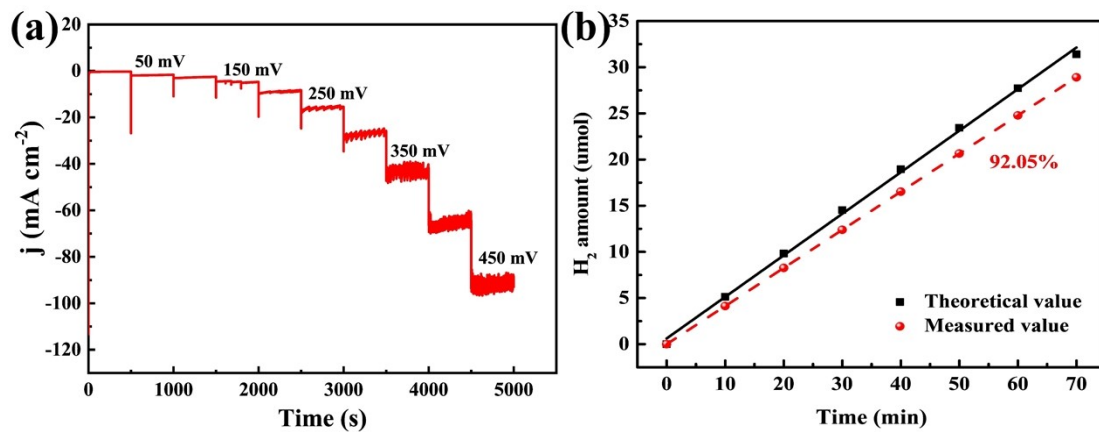

**Fig. S22.** (a) Multi-step chronoamperometric curve at diverse overpotentials and (b) hydrogen production efficiency of Ni<sub>3</sub>P/Ni@N-CNFs under alkaline conditions.

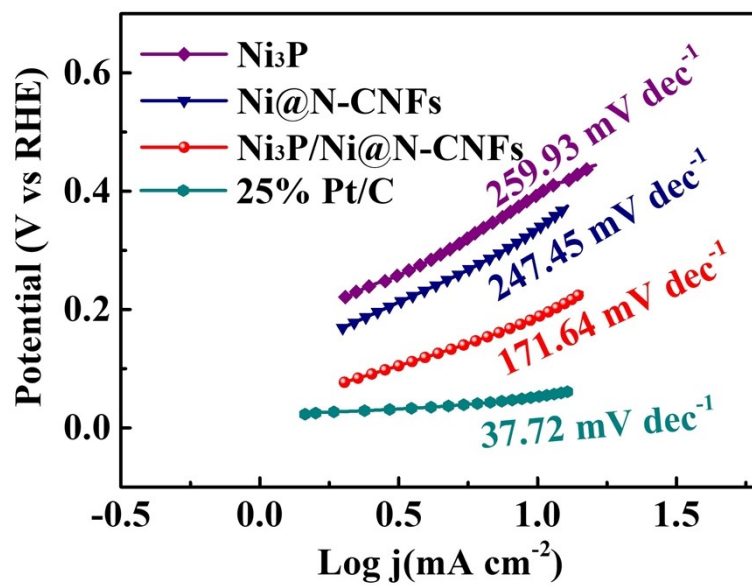

**Fig. S23.** The corresponding Tafel slopes the Ni<sub>3</sub>P/Ni@N-CNFs and control samples in 1 M PBS.

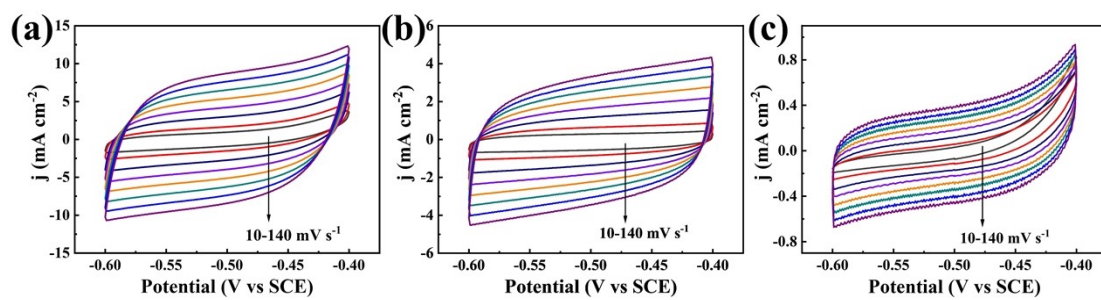

**Fig. S24.** Cyclic voltammety curves of the samples with different scanning rates (10, 20, 40, 60, 80, 100, 120, 140  $\text{mV s}^{-1}$ ) for HER in 1 M PBS electrolyte. (a)  $\text{Ni}_3\text{P/Ni@N-CNFs}$ ; (b)  $\text{Ni@N-CNFs}$ ; and (c)  $\text{Ni}_3\text{P}$ .

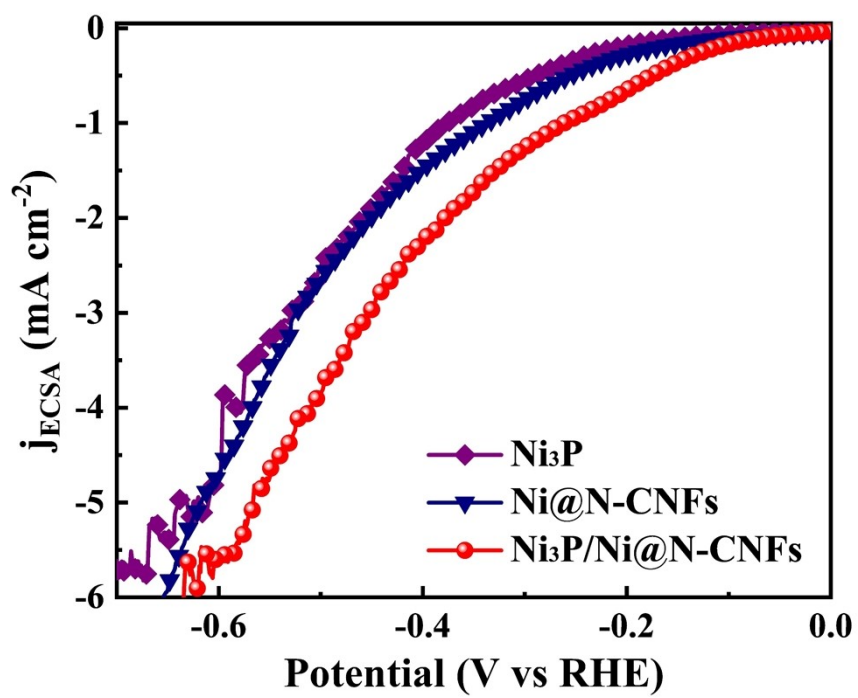

Fig. S25. LSVs normalized by ECSA of HER under neutral condition.

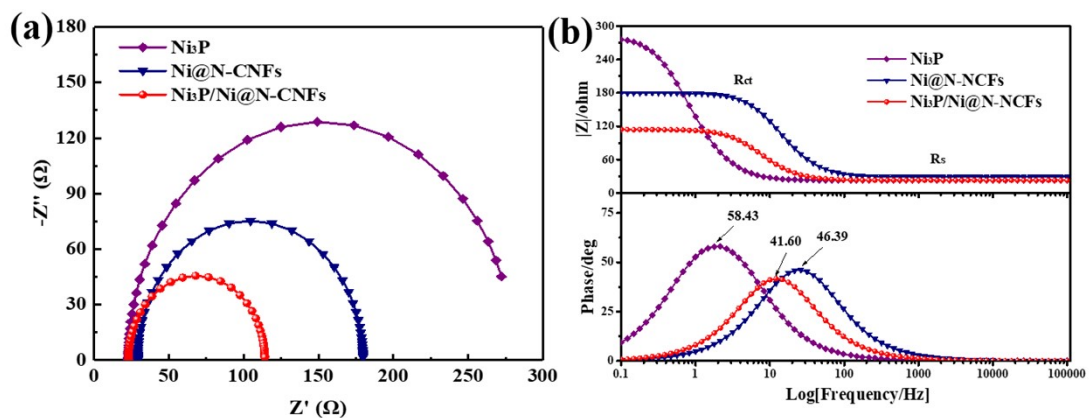

**Fig. S26.** (a) The double-layer capacitance ( $C_{dl}$ ) for the evaluation of ECSA and (b) Bode plot of Ni<sub>3</sub>P/Ni@N-CNFs, Ni@N-CNFs and Ni<sub>3</sub>P in neutral media.

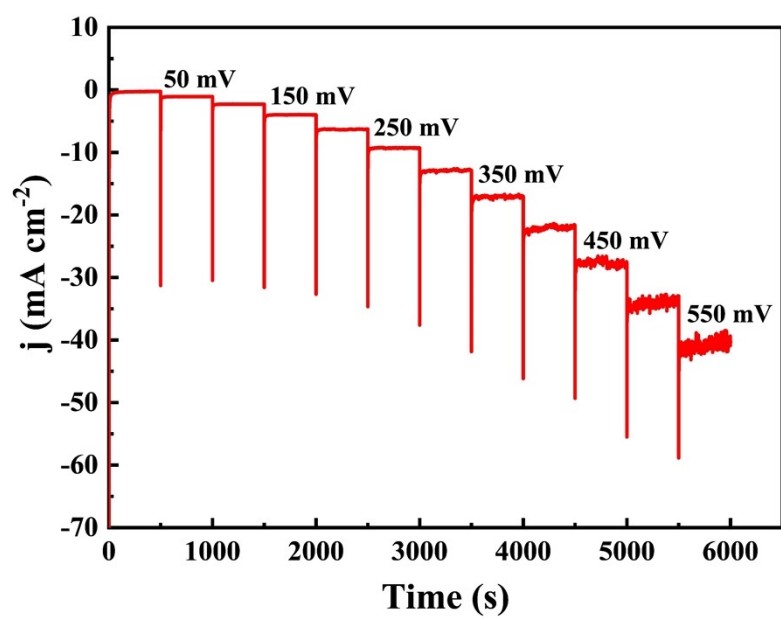

**Fig. S27.** Multi-step chronoamperometric curve at diverse overpotentials of  $\text{Ni}_3\text{P}/\text{Ni}@\text{N-CNFs}$  under neutral conditions.

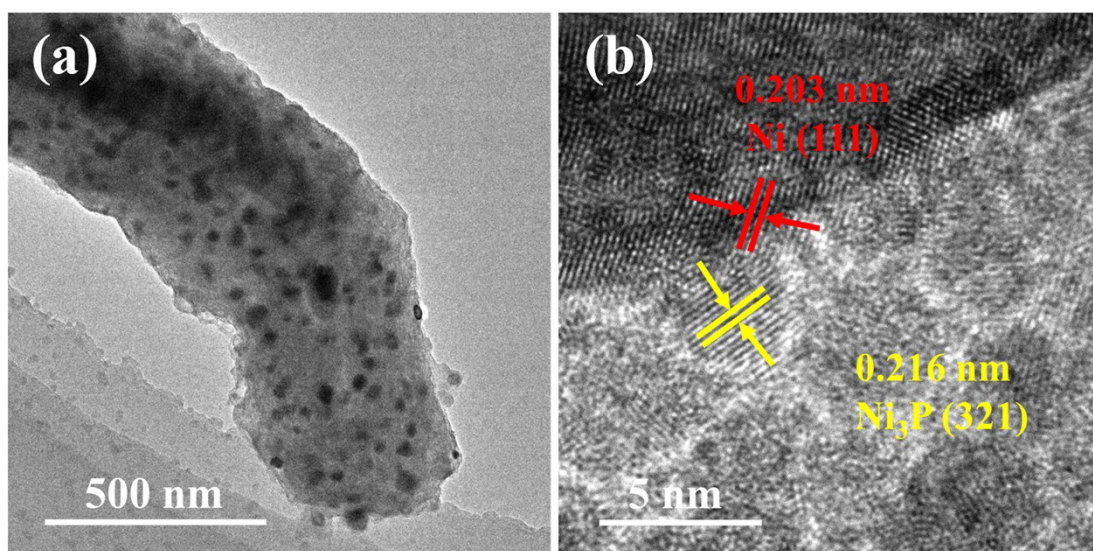

**Fig. S28.** (a) TEM image and (b) HRTEM image of the Ni<sub>3</sub>P/Ni@N-CNFs after stability test of *i-t* curve for 60 h at pH 7.



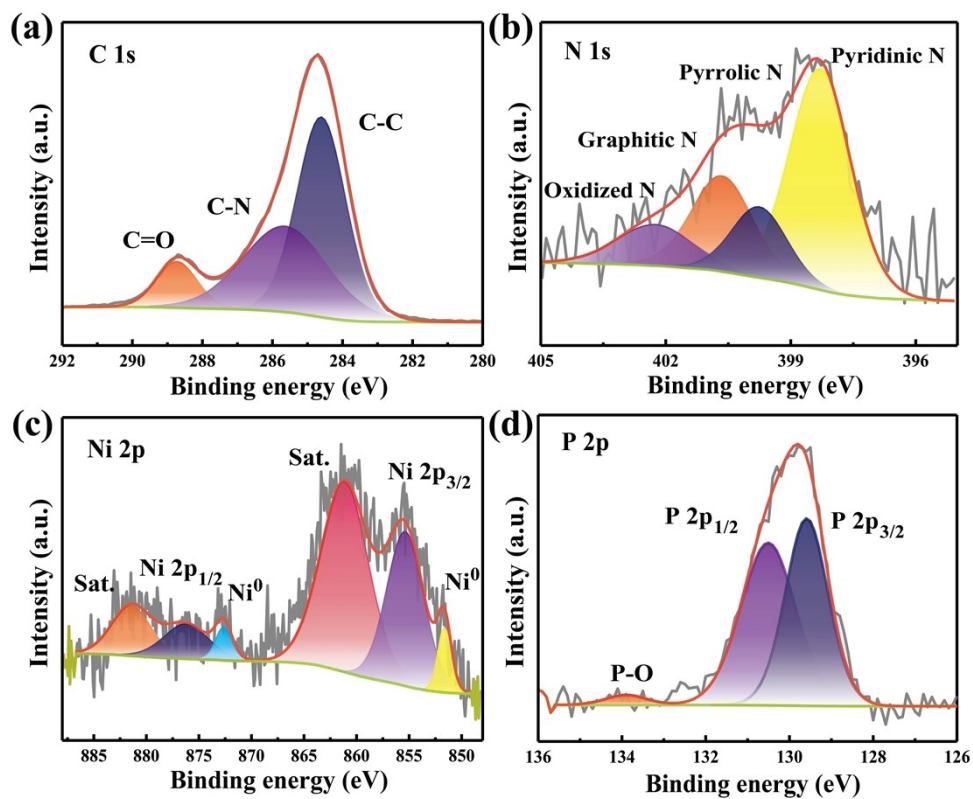

**Fig. S29.** XPS spectra of the  $\text{Ni}_3\text{P}/\text{Ni}@\text{N-CNFs}$  after HER electrochemical test in 1 M PBS: (a) C 1s; (b) N 1s; (c) Ni 2p; (d) P 2p.

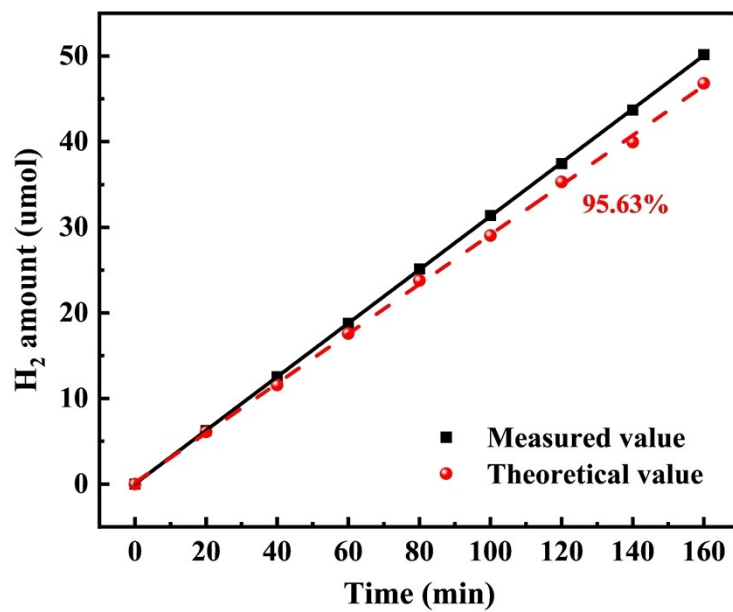

**Fig. S30.** Hydrogen production efficiency of Ni<sub>3</sub>P/Ni@N-CNFs under neutral conditions.

**Table S1.** Surface elements contents of samples at different temperatures obtained by XPS.

| <b>Catalyst</b>                      | <b>C 1s [%]</b> | <b>N 1s [%]</b> | <b>Ni 2p [%]</b> | <b>P 2p [%]</b> | <b>O 1s [%]</b> |
|--------------------------------------|-----------------|-----------------|------------------|-----------------|-----------------|
| <b>Ni<sub>3</sub>P/Ni@N-CNFs-600</b> | 57.93           | 6.29            | 11.48            | 1.58            | 22.72           |
| <b>Ni<sub>3</sub>P/Ni@N-CNFs-700</b> | 60.77           | 7.97            | 7.98             | 1.36            | 21.92           |
| <b>Ni<sub>3</sub>P/Ni@N-CNFs-800</b> | 51.90           | 3.77            | 15.36            | 1.09            | 27.87           |
| <b>Ni<sub>3</sub>P/Ni@N-CNFs-900</b> | 60.71           | 2.14            | 5.10             | 0.71            | 31.34           |

**Table S2.** (a) The details for calculated fractions of each nitrogen species in the N 1s XPS spectrum.

| Catalyst                             | Pyridinic N | Pyrrolic N | Graphitic N | Oxidized N |
|--------------------------------------|-------------|------------|-------------|------------|
|                                      | [%]         | [%]        | [%]         | [%]        |
| <b>Ni<sub>3</sub>P/Ni@N-CNFs-600</b> | 44.81       | 21.37      | 25.34       | 8.47       |
| <b>Ni<sub>3</sub>P/Ni@N-CNFs-700</b> | 46.74       | 21.13      | 24.17       | 7.96       |
| <b>Ni<sub>3</sub>P/Ni@N-CNFs-800</b> | 45.99       | 21.59      | 23.97       | 8.45       |
| <b>Ni<sub>3</sub>P/Ni@N-CNFs-900</b> | 35.55       | 20.88      | 34.08       | 9.50       |

**Table S2.** (b) The details of the proportion of each N species in the whole sample were derived from the calculations.

| Catalyst                             | Pyridinic N | Pyrrolic N | Graphitic N | Oxidized N |
|--------------------------------------|-------------|------------|-------------|------------|
|                                      | [%]         | [%]        | [%]         | [%]        |
| <b>Ni<sub>3</sub>P/Ni@N-CNFs-600</b> | 2.82        | 1.34       | 1.59        | 0.53       |
| <b>Ni<sub>3</sub>P/Ni@N-CNFs-700</b> | 3.73        | 1.68       | 1.93        | 0.63       |
| <b>Ni<sub>3</sub>P/Ni@N-CNFs-800</b> | 1.73        | 0.81       | 0.90        | 0.32       |
| <b>Ni<sub>3</sub>P/Ni@N-CNFs-900</b> | 0.76        | 0.45       | 0.73        | 0.20       |

**Table S3.** Fitted data from Nyquist plots of as-prepared samples in electrocatalytic HER test under 0.5 M H<sub>2</sub>SO<sub>4</sub>.

| <b>Electrocatalysts</b>     | <b>R<sub>s</sub> (Ω)</b> | <b>R<sub>ct</sub> (Ω)</b> |
|-----------------------------|--------------------------|---------------------------|
| Ni <sub>3</sub> P/Ni@N-CNFs | 6.48                     | 24.84                     |
| Ni@N-CNFs                   | 9.24                     | 63.2                      |
| Ni <sub>3</sub> P           | 4.55                     | 221.7                     |

**Table S4.** Comparison of HER performance between the results from the present research with other recently-reported metal phosphides in 0.5 M H<sub>2</sub>SO<sub>4</sub>.

|    | HER catalysts                          | Electrolyte                          | Overpotentials                | Stability   | References                                             |
|----|----------------------------------------|--------------------------------------|-------------------------------|-------------|--------------------------------------------------------|
| 1  | Ni <sub>3</sub> P/Ni@N-CNFs            | 0.5 M H <sub>2</sub> SO <sub>4</sub> | 121 mV@10 mA cm <sup>-2</sup> | 60 h        | <i>In this work</i>                                    |
| 2  | MoP/MoNiP@NC                           | 0.5 M H <sub>2</sub> SO <sub>4</sub> | 137 mV@10 mA cm <sup>-2</sup> | 24 h        | Chem. Eng. J. <b>2022</b> , 431, 133696.               |
| 3  | Di-CoP/C                               | 0.5 M H <sub>2</sub> SO <sub>4</sub> | 136 mV@10 mA cm <sup>-2</sup> | 40000 s     | J. Energy Chem. <b>2021</b> , 892, 115300.             |
| 4  | Ni <sub>2</sub> P-Co <sub>2</sub> P/CC | 0.5 M H <sub>2</sub> SO <sub>4</sub> | 172 mV@10 mA cm <sup>-2</sup> | 50 h        | Chem. Eng. J. <b>2021</b> , 424, 130444.               |
| 5  | Ni-P/Ni/NF                             | 0.5 M H <sub>2</sub> SO <sub>4</sub> | 83 mV@10 mA cm <sup>-2</sup>  | 40 h        | Appl. Catal. B Environ. <b>2021</b> , 282 119609.      |
| 6  | Ni <sub>2</sub> P/Ni@C                 | 0.5 M H <sub>2</sub> SO <sub>4</sub> | 149 mV@10 mA cm <sup>-2</sup> | 1000 cycles | Adv. Funct. Mater. <b>2019</b> , 19015105.             |
| 7  | CoP <sub>3</sub> /CoMoP/NF HNAs        | 0.5 M H <sub>2</sub> SO <sub>4</sub> | 125 mV@10 mA cm <sup>-2</sup> | 2 h         | ACS Sustainable Chem. Eng. <b>2019</b> , 7, 9309-9317. |
| 8  | Co/Ni-doped MoP                        | 0.5 M H <sub>2</sub> SO <sub>4</sub> | 102 mV@10 mA cm <sup>-2</sup> | 10 h        | Nano Energy <b>2020</b> , 70, 104445.                  |
| 9  | CoP-InNC@CNT                           | 0.5 M H <sub>2</sub> SO <sub>4</sub> | 153 mV@10 mA cm <sup>-2</sup> | 20 h        | Adv. Sci. <b>2020</b> , 7, 1903195.                    |
| 10 | NiCoP-CNT@NiCo/CP                      | 0.5 M H <sub>2</sub> SO <sub>4</sub> | 82 mV@10 mA cm <sup>-2</sup>  | 40 h        | J. Mater. Chem. A <b>2021</b> , 9, 1150-1158.          |
| 11 | Co-FeP NPs                             | 0.5 M H <sub>2</sub> SO <sub>4</sub> | 126 mV@10 mA cm <sup>-2</sup> | 60 h        | Appl. Surf. Sci. <b>2020</b> , 510, 145427.            |
| 12 | N-NiP <sub>2</sub>                     | 0.5 M H <sub>2</sub> SO <sub>4</sub> | 153 mV@10 mA cm <sup>-2</sup> | 30 h        | Sci. Adv. <b>2020</b> , 6 (1), eaaw8113.               |
| 13 | Ni <sub>2</sub> P-Fe <sub>2</sub> P/NF | 0.5 M H <sub>2</sub> SO <sub>4</sub> | 128 mV@10 mA cm <sup>-2</sup> | 48 h        | Adv. Funct. Mater. <b>2021</b> , 31, 2006484.          |
| 14 | NiFeP/NCH                              | 0.5 M H <sub>2</sub> SO <sub>4</sub> | 216 mV@10 mA cm <sup>-2</sup> | 72 h        | J. Am. Chem. Soc. <b>2019</b> , 141, 7906.             |
| 15 | CoP NFs                                | 0.5 M H <sub>2</sub> SO <sub>4</sub> | 122 mV@10 mA cm <sup>-2</sup> | 30 h        | ACS Catal. <b>2020</b> , 10, 412-419.                  |
| 16 | CoxP-NC-420                            | 0.5 M H <sub>2</sub> SO <sub>4</sub> | 125 mV@10 mA cm <sup>-2</sup> | 10 h        | Electrochim. Acta <b>2022</b> , 403, 139643.           |

**Table S5.** Fitted data from Nyquist plots of as-prepared samples in electrocatalytic HER test under 1 M KOH.

| <b>Electrocatalysts</b>          | <b><math>R_s</math> (<math>\Omega</math>)</b> | <b><math>R_{ct}</math> (<math>\Omega</math>)</b> |
|----------------------------------|-----------------------------------------------|--------------------------------------------------|
| <b>Ni<sub>3</sub>P/Ni@N-CNFs</b> | 3.1                                           | 27.50                                            |
| <b>Ni@N-CNFs</b>                 | 2.97                                          | 83.56                                            |
| <b>Ni<sub>3</sub>P</b>           | 1.45                                          | 227.90                                           |

**Table S6.** Fitted data from Nyquist plots of as-prepared samples in electrocatalytic HER test under 1 M PBS.

| <b>Electrocatalysts</b>          | <b><math>R_s</math> (<math>\Omega</math>)</b> | <b><math>R_{ct}</math> (<math>\Omega</math>)</b> |
|----------------------------------|-----------------------------------------------|--------------------------------------------------|
| <b>Ni<sub>3</sub>P/Ni@N-CNFs</b> | 4.39                                          | 91.18                                            |
| <b>Ni@N-CNFs</b>                 | 4.05                                          | 150.6                                            |
| <b>Ni<sub>3</sub>P</b>           | 3.97                                          | 257.5                                            |



**Table S7.** Comparison of HER performance between the results from the present research with other recently-reported metal phosphides in 1 M KOH.

|    | HER catalysts                          | Electrolyte | Overpotentials                  | Stability   | References                                                      |
|----|----------------------------------------|-------------|---------------------------------|-------------|-----------------------------------------------------------------|
| 1  | Ni <sub>3</sub> P/Ni@N-CNFs            | 1 M KOH     | 145 mV@10 mA cm <sup>-2</sup>   | 60 h        | <i>In this work</i>                                             |
| 2  | CoP-NC@NFP                             | 1 M KOH     | 162 mV@10 mA cm <sup>-2</sup>   | 50 h        | Chem. Eng. J. <b>2022</b> , 428, 131115.                        |
| 3  | FeCoP <sub>2</sub> @NPPC               | 1 M KOH     | 150 mV@10 mA cm <sup>-2</sup>   | 12 h        | ACS Appl. Mater. Interfaces <b>2021</b> , 13, 7, 8832-8843      |
| 4  | CoP@FeCoP/NC<br>YSMPs                  | 1 M KOH     | 141 mV@10 mA cm <sup>-2</sup>   | 20 h        | Chem. Eng. J., <b>2021</b> , 403: 126312                        |
| 5  | MoP@NC                                 | 1 M KOH     | 149 mV@10 mA cm <sup>-2</sup>   | 45 h        | Appl. Catal., B <b>2020</b> , 263, 118358.                      |
| 6  | MoPS/NC                                | 1 M KOH     | 158 mV@10 mA cm <sup>-2</sup>   | 5 h         | Appl. Catal., B <b>2019</b> , 245, 656-661                      |
| 7  | NiFeP@C                                | 1 M KOH     | 160 mV@10 mA cm <sup>-2</sup>   | 25 h        | ACS Appl. Mater. Interfaces <b>2020</b> , 12 (17), 19447-19456. |
| 8  | Cr-doped FeNi-P/NCN                    | 1 M KOH     | 190 mV@10 mA cm <sup>-2</sup>   | 1000 cycles | Adv. Mater, <b>2019</b> , 31: 1900178                           |
| 9  | FeNiP/PG                               | 1 M KOH     | 173 mV@10 mA cm <sup>-2</sup>   | 10 h        | J. Mater. Chem. A <b>2019</b> , 7, 14526.                       |
| 10 | Ni-CoP/Co <sub>2</sub> P@NC            | 1 M KOH     | 117 mV@10 mA cm <sup>-2</sup>   | 50 h        | Chem. Eng. J. <b>2022</b> , 433, 133523.                        |
| 11 | Ni-P/Ni/NF                             | 1 M KOH     | 129 mV@10 mA cm <sup>-2</sup>   | 40 h        | Appl. Catal., B <b>2021</b> , 282, 119609.                      |
| 12 | W <sub>2</sub> C/WP@NC                 | 1 M KOH     | 196.2 mV@10 mA cm <sup>-2</sup> | 12 h        | ACS Appl. Mater. Interfaces <b>2021</b> , 13, 45, 53955-53964   |
| 13 | CoP/Co <sub>2</sub> P@NC               | 1 M KOH     | 198 mV@10 mA cm <sup>-2</sup>   | 24 h        | ACS Sustainable Chem. Eng. <b>2019</b> , 7, 8993-9001           |
| 14 | FeP <sub>2</sub> -NiP <sub>2</sub> @PC | 1 M KOH     | 248 mV@10 mA cm <sup>-2</sup>   | 20 h        | ACS Appl. Mater. Interfaces <b>2020</b> , 12, 727-733.          |
| 15 | CoP-InNC@CNT                           | 1 M KOH     | 125 mV@10 mA cm <sup>-2</sup>   | 10 h        | Adv. Sci. <b>2020</b> , 7, 1903195.                             |
| 16 | Mn-FeP                                 | 1 M KOH     | 173 mV@10 mA cm <sup>-2</sup>   | 10 h        | ACS Sustainable Chem. Eng. <b>2019</b> , 7, 14, 12419-12427     |

**Table S8.** Comparison of HER performance between the results from the present research with other recently-reported metal phosphides in 1 M PBS.

|    | HER catalysts                               | Electrolyte | Overpotentials                   | Stability   | References                                            |
|----|---------------------------------------------|-------------|----------------------------------|-------------|-------------------------------------------------------|
| 1  | Ni <sub>3</sub> P/Ni@N-CNFs                 | 1 M PBS     | 187 mV@10 mA cm <sup>-2</sup>    | 120 h       | <i>In this work</i>                                   |
| 2  | Cu <sub>3</sub> P@NPC-CF                    | 1 M PBS     | 192.52 mV@10 mA cm <sup>-2</sup> | 90 h        | Sustain. Energy Fuels <b>2021</b> , 5, 2451-2457.     |
| 3  | pFe/FeP                                     | 1 M PBS     | 250 mV@10 mA cm <sup>-2</sup>    | 40 h        | Chem. Eng. J., <b>2021</b> , 408, 127330.             |
| 4  | CoP/Co <sub>2</sub> P@NC                    | 1 M PBS     | 459 mV@10 mA cm <sup>-2</sup>    | 20 h        | ACS Sustainable Chem. Eng. <b>2019</b> , 7, 8993-9001 |
| 5  | 0.02 Ni-MoP                                 | 1 M PBS     | 222 mV@10 mA cm <sup>-2</sup>    | 1000 cycles | Nano Energy, <b>2020</b> , 70, 104445                 |
| 6  | MoP@NC NWs                                  | 1 M PBS     | 191 mV@10 mA cm <sup>-2</sup>    | 5000 cycles | Appl. Catal. B Environ. <b>2020</b> , 263, 118358.    |
| 7  | CoP/NiCoP/NC                                | 1 M PBS     | 123 mV@10 mA cm <sup>-2</sup>    | 80 h        | Adv. Funct. Mater. <b>2019</b> , 29, 1807976.         |
| 8  | Co <sub>2</sub> P-NC-900                    | 1 M PBS     | 315 mV@10 mA cm <sup>-2</sup>    | 12 h        | ChemSusChem. <b>2020</b> , 13, 351.                   |
| 9  | MoP700                                      | 1 M PBS     | 196 mV@10 mA cm <sup>-2</sup>    | 2 h         | ACS Catal. <b>2019</b> , 9, 8712-8718.                |
| 10 | CoP-NC                                      | 1 M PBS     | 252 mV@10 mA cm <sup>-2</sup>    | 10 h        | Electrochim. Acta, <b>2021</b> , 375, 137966.         |
| 11 | Ni <sub>2</sub> P@NPCNFs                    | 1 M PBS     | 185.3 mV@10 mA cm <sup>-2</sup>  | 30 h        | Angew. Chem. Int. Ed. <b>2018</b> , 57, 1963.         |
| 12 | Ni <sub>2</sub> P-Ru <sub>2</sub> P/CCG-800 | 1 M PBS     | 113.38 mV@10 mA cm <sup>-2</sup> | 24 h        | Chem. Eng. J. <b>2022</b> , 432, 134422.              |
| 13 | CoP/PCNF                                    | 1 M PBS     | 191 mV@10 mA cm <sup>-2</sup>    | 40000 s     | Nano Res. <b>2018</b> , 11, 1274.                     |
| 14 | NiCo-P/Ni mesh                              | 1 M PBS     | 250 mV@10 mA cm <sup>-2</sup>    | 6 h         | ACS Sustainable Chem Eng, <b>2019</b> , 7, 10734      |
| 15 | Co-WP                                       | 1 M PBS     | 189 mV@10 mA cm <sup>-2</sup>    | 60 h        | Appl. Catal. B Environ. <b>2019</b> , 251, 162-167.   |
| 16 | FeP/NCNSs                                   | 1 M PBS     | 409 mV@10 mA cm <sup>-2</sup>    | 20 h        | ACS Sustainable Chem.Eng. <b>2018</b> , 6, 11587      |
| 17 | CoP@3D-NPC                                  | 1 M PBS     | 333 mV@10 mA cm <sup>-2</sup>    | 6 h         | Appl. Surf. Sci. <b>2019</b> , 476, 749.              |
